# Supplementary material for: Network Topologies and Convergent Aetiologies Arising from Deletions and Duplications Observed in Individuals with Autism
Source: PLoS Genet. 2013 Jun 6;9(6):e1003523. doi: 10.1371/journal.pgen.1003523 (PMC3675007; doi:10.1371/journal.pgen.1003523)
Supplement: Table S8 — Regulatory GO enrichments amongst ASD dn CNVs candidate genes after reclassifying partially-duplicated genes as deleted. The candidate genes considered here are the subset of CNV genes whose orthologues have synaptic phenotypes in mice plus other CNV genes whose protein products directly interact with the synaptic genes' proteins. If the outcomes of many of these genes' duplications result in the increased down-regulation of their targets, then each such gene would be expected to be duplicated largely in its entirety for the duplication to be functional. Indeed, after removing partially-duplicated genes, we find that the enrichment of duplicated genes that negatively regulate biological processes increases (32/92 genes, +119% enrichment, BH-adjusted p = 0.005; Table 1). Concomitantly, including the partially-duplicated genes that would be expected to functionally resemble deletions, with the deleted genes maintains the enrichment of positive regulators (40/95 genes, +134% enrichment, BH-adjusted p = 2×10−5; Table 1). Corroboratively, the proportions of genes that regulate in the opposite direction to the proposed general model (i.e. the opposite being positively regulating candidate genes in deletions and negatively regulating candidate genes in duplications) are reduced when considering partially duplicated genes as deleted genes. (XLSX) [file pgen.1003523.s015.xlsx]

## Sheet: Sheet1
Copy Change Direction	Total GO genes	Positive regulators (GO:0048518)			Negative Regulators (GO:0048519)
		Genes	BH-adjusted p-value	Enrichment	Genes	BH-adjusted p-value	Enrichment
Complete Duplications	92	19 (21%)	>1	1.1-fold	32 (35%)	0.005	2.2-fold
Deletions + partial duplications	95	40 (42%)	2e-05	2.4-fold	26 (27%)	0.11	1.7-fold
